# Supplementary material
Source: Springer Nature journal article supplement (https://www.springermedizin.de/resource/supplementary/12911_2013_809_MOESM7_ESM.pdf/9526688)
Supplement: MOESM7 [file 9526688]

| <b>Guideline formalism / Feature</b>        | <i>Arden Syntax</i>                                                                                                    | <i>PROforma</i>                                                                                                                                                       | <i>GLIF3</i>                                                                                                                                                 | <i>Asbru</i>                                                                                                                                                                 | <i>SAGE</i>                                                                                                                                                        | <i>GDL</i>                                                                                                                                                                                                                                  | <i>GELLO</i>                                                                                                                                                                       |
|---------------------------------------------|------------------------------------------------------------------------------------------------------------------------|-----------------------------------------------------------------------------------------------------------------------------------------------------------------------|--------------------------------------------------------------------------------------------------------------------------------------------------------------|------------------------------------------------------------------------------------------------------------------------------------------------------------------------------|--------------------------------------------------------------------------------------------------------------------------------------------------------------------|---------------------------------------------------------------------------------------------------------------------------------------------------------------------------------------------------------------------------------------------|------------------------------------------------------------------------------------------------------------------------------------------------------------------------------------|
| <b>Type</b>                                 | rule-based language                                                                                                    | task-network model                                                                                                                                                    | task-network model                                                                                                                                           | task-network model                                                                                                                                                           | task-network model                                                                                                                                                 | rule-based language                                                                                                                                                                                                                         | object-oriented constraint language                                                                                                                                                |
| <b>Core elements</b>                        | medical logic modules                                                                                                  | plans, actions, decisions, enquiries                                                                                                                                  | actions, decisions, synchronisations, branches, clinical stages                                                                                              | logic statements                                                                                                                                                             | actions, decisions, contexts, routes                                                                                                                               | archetype bindings, rule expressions, term bindings                                                                                                                                                                                         | OCL-based expressions                                                                                                                                                              |
| <b>Information and knowledge complexity</b> | modular organisation of rules through medical logic modules; uses types from HL7; events trigger medical logic modules | arguments can be attached to decision candidates; thorough support for preconditions, postconditions, triggers and scheduling constraints; based on logic programming | focus on guideline nesting; the HL7 RIM provides a thorough clinical information model; can be used in conjunction with an expression language such as GELLO | unique feature of specifying and considering intentions; support for complex temporal patterns in relation to intentions; parameter definitions can be made based on context | various recommendation types available and order sets supported; the HL7 RIM provides a thorough clinical information model; GELLO provided as expression language | archetypes represent clinical knowledge as shareable clinical content models; the openEHR RM provides a thorough clinical information model; term bindings to multiple reference terminologies and connections to several natural languages | combination of OCL, medical logic modules and the vMR subset of HL7 RIM; the HL7 RIM provides a thorough clinical information model; thorough expression possibilities through OCL |

|                                               |                                                                                                                                                                          |                                                                                                                       |                                                                                                                                                                               |                                                                                                                                                                          |                                                                                                                                                                          |                                                                                                                                                           |                                                                                                                                                                          |
|-----------------------------------------------|--------------------------------------------------------------------------------------------------------------------------------------------------------------------------|-----------------------------------------------------------------------------------------------------------------------|-------------------------------------------------------------------------------------------------------------------------------------------------------------------------------|--------------------------------------------------------------------------------------------------------------------------------------------------------------------------|--------------------------------------------------------------------------------------------------------------------------------------------------------------------------|-----------------------------------------------------------------------------------------------------------------------------------------------------------|--------------------------------------------------------------------------------------------------------------------------------------------------------------------------|
| <b>Linkage to standard terminologies</b>      | bindings to any terminology possible through medical logic modules                                                                                                       | no intrinsic support, but some platforms provide further functionality. The tool HeCaSe2, for example, supports UMLS. | bindings to terminologies possible through medical concepts                                                                                                                   | ICD, LOINC                                                                                                                                                               | SNOMED CT, LOINC, NDF-RT                                                                                                                                                 | bindings to any terminology possible through archetypes and terminology binding section                                                                   | bindings to any terminology possible through medical logic modules                                                                                                       |
| <b>Degree of patient data standardisation</b> | local institution-specific data definitions, leading to the 'curly braces problem'                                                                                       | no standards used                                                                                                     | supports HL7                                                                                                                                                                  | no standards used                                                                                                                                                        | HL7 RIM, VMRs derived from HL7 RIM, Clinical Expression Model for data representation consistency                                                                        | based on openEHR                                                                                                                                          | based on HL7                                                                                                                                                             |
| <b>Dependence on natural languages</b>        | translation of a guideline representation has to be done manually. The linkage to standard terminologies may facilitate automatic translations, since some terminologies | translation of a guideline representation has to be done manually                                                     | translation of a guideline representation has to be done manually. The linkage to standard terminologies may facilitate automatic translations, since some terminologies like | translation of a guideline representation has to be done manually. The linkage to standard terminologies may facilitate automatic translations, since some terminologies | translation of a guideline representation has to be done manually. The linkage to standard terminologies may facilitate automatic translations, since some terminologies | natural-language independency through archetypes, indirect reference to data elements in the rules, language codes indexed meta-data and term_definitions | translation of a guideline representation has to be done manually. The linkage to standard terminologies may facilitate automatic translations, since some terminologies |

|                                         |                                                              |                                        |                                                         |                                                              |                                                              |                                                                        |                                                                        |
|-----------------------------------------|--------------------------------------------------------------|----------------------------------------|---------------------------------------------------------|--------------------------------------------------------------|--------------------------------------------------------------|------------------------------------------------------------------------|------------------------------------------------------------------------|
|                                         | like SNOMED CT are available in different natural languages. |                                        | SNOMED CT are available in different natural languages. | like SNOMED CT are available in different natural languages. | like SNOMED CT are available in different natural languages. |                                                                        | like SNOMED CT are available in different natural languages.           |
| <b>Ongoing development and research</b> | no current further development or research                   | ongoing research into new applications | ongoing research into new applications                  | ongoing research into new applications                       | ongoing research into new applications                       | ongoing development of the language and research into new applications | ongoing development of the language and research into new applications |

HL7 RIM: Health Level Seven Reference Information Model

HL7: Health Level Seven

ICD: International Classification of Diseases

LOINC: Logical Observation Identifiers Names and Codes

NDF-RT: National Drug File-Reference Terminology

OCL: Object Constraint Language

openEHR RM: openEHR Reference information Model

SNOMED CT: Systematised Nomenclature of Medicine Clinical Terms

UMLS: Unified Medical Language System

VMR: virtual medical record
